# Supplementary material for: Tip of the Iceberg? Country- and Company-Level Analysis of Drug Company Payments for Research and Development in Europe
Source: PubMed Central journal article supplement (PMC10105170; doi:10.34172/ijhpm.2022.6575), 2022-03-15
Supplement: ijhpm-11-2842-s002.pdf [file ijhpm-11-2842-s002.pdf]

**Article title:** Tip of the Iceberg? Country- and Company-Level Analysis of Drug Company Payments for Research and Development in Europe

**Journal name:** International Journal of Health Policy and Management (IJHPM)

**Authors' information:** Piotr Ozieranski<sup>1\*</sup>, Luc Martinon<sup>2</sup>, Pierre-Alain Jachiet<sup>2</sup>, Shai Mulinari<sup>3</sup>

<sup>1</sup>Department of Social and Policy Sciences, University of Bath, Bath, UK.

<sup>2</sup>Euros for Docs, Paris, France.

<sup>3</sup>Department of Sociology, Lund University, Lund, Sweden.

(\*Corresponding authors: [p.ozieranski@bath.ac.uk](mailto:p.ozieranski@bath.ac.uk))

## Supplementary file 2. Background Data

**Table S1:** Distribution of drug company payments in European countries pursuing self-regulation of payment disclosure

| Country <sup>1</sup>           | Total <sup>2</sup> | Joint working <sup>3</sup> |    | Donations and grants |     | Fees for services & consultancy |     | Contributions to costs of events |     | R&D             |     |
|--------------------------------|--------------------|----------------------------|----|----------------------|-----|---------------------------------|-----|----------------------------------|-----|-----------------|-----|
|                                | €m <sup>4</sup>    | €m <sup>4</sup>            | %  | €m <sup>4</sup>      | %   | €m <sup>4</sup>                 | %   | €m <sup>4</sup>                  | %   | €m <sup>4</sup> | %   |
| UK                             | 619                | 5                          | 1% | 50                   | 8%  | 73                              | 12% | 55                               | 9%  | 435             | 70% |
| GERMANY                        | 629                |                            |    |                      |     |                                 |     |                                  |     | 404             | 64% |
| SPAIN                          | 601                |                            |    | 34                   | 6%  | 84                              | 14% | 224                              | 37% | 259             | 43% |
| BELGIUM <sup>5</sup>           | 239                |                            |    | 22                   | 9%  | 21                              | 9%  | 43                               | 18% | 154             | 64% |
| THE NETHERLANDS <sup>5,6</sup> | 199                |                            |    | N/A                  | N/A | N/A                             | N/A | N/A                              | N/A | 135             | 68% |
| POLAND                         | 164                |                            |    | 9                    | 6%  | 17                              | 10% | 33                               | 20% | 106             | 64% |
| SWEDEN                         | 90                 |                            |    | 1                    | 1%  | 10                              | 11% | 5                                | 5%  | 73              | 82% |
| SWITZERLAND                    | 167                |                            |    |                      |     |                                 |     |                                  |     | 62              | 37% |
| AUSTRIA                        | 134                |                            |    | 6                    | 5%  | 16                              | 12% | 53                               | 39% | 59              | 44% |
| FINLAND                        | 40                 |                            |    |                      |     |                                 |     |                                  |     | 25              | 63% |
| IRELAND                        | 35                 |                            |    | 3                    | 9%  | 2                               | 6%  | 9                                | 26% | 21              | 59% |
| ROMANIA <sup>7,8</sup>         | 48                 |                            |    |                      |     |                                 |     |                                  |     | 20              | 42% |
| NORWAY                         | 19                 |                            |    |                      |     |                                 |     |                                  |     | 13              | 68% |
| CZECH REPUBLIC                 |                    |                            |    |                      |     |                                 |     |                                  |     |                 | 70% |
| <b>Total</b>                   | <b>2,985</b>       |                            |    |                      |     |                                 |     |                                  |     | <b>1,766</b>    |     |

## Notes.

<sup>1</sup> – Data sources:

- Austria,<sup>127</sup> Belgium,<sup>189</sup> Germany,<sup>128</sup> Poland,<sup>129</sup> Spain,<sup>130</sup> the Netherlands,<sup>131</sup> and Switzerland<sup>132</sup> – publicly available national pharmaceutical industry group press releases.
- Czech Republic – the EFPIA 2019 Europe-wide report.<sup>82</sup>
- Finland,<sup>133</sup> Norway,<sup>134</sup> and Sweden<sup>135</sup> – email communication with the national pharmaceutical industry trade groups.
- Ireland – the EFPIA 2019 Europe-wide report<sup>82</sup> and email communication with the national pharmaceutical industry trade group.<sup>190</sup>
- Romania – a national pharmaceutical industry trade group report,<sup>94</sup> individual drug company websites signposted in the report, and data obtained from the public database of industry payments.<sup>96</sup>
- UK – a trade group press release<sup>191</sup> as well as calculations using data obtained from Disclosure UK, a publicly available database of pharmaceutical industry payments.<sup>95</sup>
- If more than one data source was available data provided directly by pharmaceutical industry trade groups took precedence over national-level reports, which, in turn, took precedence over the EFPIA Europe-wide report.

<sup>2</sup> – Given the rounding the totals do not always match the sum of payments related to different payment categories.

<sup>3</sup> – Joint working is a unique payment category introduced only by the Association of the British Pharmaceutical Industry. It covers projects involving funders and recipients pulling together resources to deliver shared projects.<sup>192</sup>

<sup>4</sup> – All payment values in non-euro currencies were converted to euros based on the average yearly exchanged rates published by the European Central Bank.<sup>137</sup>

<sup>5</sup> – All statistics for Belgium and the Netherlands cover both the pharmaceutical and medical devices industries. Statistics for other countries cover the pharmaceutical industry only.

<sup>6</sup> – Non-R&D payments reported in the Netherlands do not follow the EFPIA Code, but R&D payments are reported consistently with the EFPIA Code, including their non-disclosure on a named basis. This means R&D payments reported in the Netherlands can be added to R&D payments reported in the other countries reported in the table. In addition, the sum of non-R&D payments reported in the Netherlands was obtained by adding payments made either to healthcare professionals or organisations. Therefore, the sum of payments reported in the Netherlands can be compared with the other country sums from the table.

<sup>7</sup> – The total value of industry payments in Romania in 2019 includes €28m of non-R&D payments (calculated based on data reported in a publicly-run disclosure platform) and €20m of R&D payments

(calculated using a pharmaceutical industry trade group report and data from individual drug company websites – see footnote 1).

<sup>8</sup> – The value of R&D payments in Romania was calculated using a report published on the website of the Romanian pharmaceutical industry trade group<sup>94</sup> and individual drug company websites mentioned in the report.

**Table S2.** Top 20 drug company funders in Belgium, Ireland and the UK based on the value of R&D payments (2017-19)

|    | BELGIUM              |                           |                                |                           |                     | IRELAND              |                           |                                |                           |                     | UK                   |                           |                                |                           |                     |
|----|----------------------|---------------------------|--------------------------------|---------------------------|---------------------|----------------------|---------------------------|--------------------------------|---------------------------|---------------------|----------------------|---------------------------|--------------------------------|---------------------------|---------------------|
|    | Company name         | R&D payments – value (€m) | At least once in global top 50 | Global sales – value (€m) | Global sales – rank | Company name         | R&D payments – value (€m) | At least once in global top 50 | Global sales – value (€m) | Global sales – rank | Company name         | R&D payments – value (€m) | At least once in global top 50 | Global sales – value (€m) | Global sales – rank |
| 1  | Roche                | 55                        | Yes                            | 117,882                   | 1                   | Allergan             | 16                        | Yes                            | 39,219                    | 17                  | Astrazeneca          | 167                       | Yes                            | 55801                     | 12                  |
| 2  | Msd                  | 43                        | Yes                            | 99,576                    | 4                   | Abbvie               | 4                         | Yes                            | 80,690                    | 7                   | Allergan             | 102                       | Yes                            | 39219                     | 17                  |
| 3  | Janssen              | 36                        | Yes                            | 99,220                    | 5                   | Janssen              | 4                         | Yes                            | 99,220                    | 5                   | Bristol-Myers-Squibb | 93                        | Yes                            | 71725                     | 9                   |
| 4  | Astrazeneca          | 28                        | Yes                            | 55,801                    | 12                  | Msd                  | 4                         | Yes                            | 99,576                    | 4                   | Roche                | 76                        | Yes                            | 117882                    | 1                   |
| 5  | Novartis             | 24                        | Yes                            | 115,170                   | 3                   | Bristol-Myers-Squibb | 3                         | Yes                            | 71,725                    | 9                   | Novartis             | 73                        | Yes                            | 115170                    | 3                   |
| 6  | Celgene              | 19                        | Yes                            | 24,383                    | 24                  | Pfizer               | 3                         | Yes                            | 117,627                   | 2                   | Bayer                | 71                        | Yes                            | 47632                     | 15                  |
| 7  | Pfizer               | 18                        | Yes                            | 117,627                   | 2                   | Servier              | 2                         | Yes                            | 12,543                    | 30                  | Msd                  | 70                        | Yes                            | 99576                     | 4                   |
| 8  | Bristol-Myers-Squibb | 17                        | Yes                            | 71,725                    | 9                   | Bayer                | 2                         | Yes                            | 47,632                    | 15                  | Janssen              | 69                        | Yes                            | 99220                     | 5                   |
| 9  | Boehringer-Ingelheim | 12                        | Yes                            | 39,187                    | 18                  | Novartis             | 2                         | Yes                            | 115,170                   | 3                   | Pfizer               | 64                        | Yes                            | 117627                    | 2                   |
| 10 | Bayer                | 12                        | Yes                            | 47,632                    | 15                  | Roche                | 2                         | Yes                            | 117,882                   | 1                   | Glaxosmithkline      | 63                        | Yes                            | 79356                     | 8                   |

|    |                                     |    |     |        |    |                      |   |     |        |    |                      |    |     |       |    |
|----|-------------------------------------|----|-----|--------|----|----------------------|---|-----|--------|----|----------------------|----|-----|-------|----|
| 11 | Servier                             | 10 | Yes | 12,543 | 30 | Gilead               | 2 | Yes | 60,525 | 10 | Celgene              | 45 | Yes | 24383 | 24 |
| 12 | Abbvie                              | 10 | Yes | 80,690 | 7  | Shire                | 1 | Yes | 25,524 | 23 | Boehringer-Ingelheim | 32 | Yes | 39187 | 18 |
| 13 | Lilly                               | 9  | Yes | 50,978 | 14 | Astrazeneca          | 1 | Yes | 55,801 | 12 | Ucb                  | 27 | Yes | 13023 | 29 |
| 14 | Medtronic                           | 8  | No  | 0      | -  | Amgen                | 1 | Yes | 58,268 | 11 | Biogen               | 26 | Yes | 28580 | 22 |
| 15 | Glaxosmithkline                     | 8  | Yes | 79,356 | 8  | Glaxosmithkline      | 1 | Yes | 79,356 | 8  | Servier              | 25 | Yes | 12543 | 30 |
| 16 | Regeneron-Ireland-Unlimited-Company | 7  | Yes | 11,097 | 35 | Celgene              | 1 | Yes | 24,383 | 24 | Takeda               | 25 | Yes | 52943 | 13 |
| 17 | Amgen                               | 6  | Yes | 58,268 | 11 | Novo-Nordisk         | 1 | Yes | 46,423 | 16 | Novo-Nordisk         | 24 | Yes | 46423 | 16 |
| 18 | Gilead                              | 5  | Yes | 60,525 | 10 | Biogen               | 0 | Yes | 28,580 | 22 | Sanofi               | 20 | Yes | 91197 | 6  |
| 19 | Sanofi                              | 4  | Yes | 91,197 | 6  | Ucb                  | 0 | Yes | 13,023 | 29 | Amgen                | 20 | Yes | 58268 | 11 |
| 20 | Amplitude                           | 3  | No  | 0      | -  | Boehringer-Ingelheim | 0 | Yes | 39,187 | 18 | Abbvie               | 19 | Yes | 80690 | 7  |

**Table S3:** Top 20 drug company funders in Belgium, Ireland and the UK based on the value of all payments (2017-19)

|    | BELGIUM              |                           |                                |                           |                     | IRELAND              |                           |                                |                           |                     | UK                   |                           |                                |                           |                     |
|----|----------------------|---------------------------|--------------------------------|---------------------------|---------------------|----------------------|---------------------------|--------------------------------|---------------------------|---------------------|----------------------|---------------------------|--------------------------------|---------------------------|---------------------|
|    | Company name         | R&D payments – value (€m) | At least once in global top 50 | Global sales – value (€m) | Global sales – rank | Company name         | R&D payments – value (€m) | At least once in global top 50 | Global sales – value (€m) | Global sales – rank | Company name         | R&D payments – value (€m) | At least once in global top 50 | Global sales – value (€m) | Global sales – rank |
| 1  | Roche                | 69                        | Yes                            | 117,882                   | 1                   | Allergan             | 16                        | Yes                            | 39,219                    | 17                  | Astrazeneca          | 183                       | Yes                            | 55,801                    | 12                  |
| 2  | Msd                  | 56                        | Yes                            | 99,576                    | 4                   | Abbvie               | 9                         | Yes                            | 80,690                    | 7                   | Allergan             | 107                       | Yes                            | 39,219                    | 17                  |
| 3  | Janssen              | 52                        | Yes                            | 99,220                    | 5                   | Pfizer               | 7                         | Yes                            | 117,627                   | 2                   | Glaxosmithkline      | 106                       | Yes                            | 79,356                    | 8                   |
| 4  | Astrazeneca          | 34                        | Yes                            | 55,801                    | 12                  | Janssen              | 7                         | Yes                            | 99,220                    | 5                   | Novartis             | 103                       | Yes                            | 115,170                   | 3                   |
| 5  | Novartis             | 32                        | Yes                            | 115,170                   | 3                   | Novartis             | 6                         | Yes                            | 115,170                   | 3                   | Bristol-Myers-Squibb | 102                       | Yes                            | 71,725                    | 9                   |
| 6  | Pfizer               | 31                        | Yes                            | 117,627                   | 2                   | Msd                  | 6                         | Yes                            | 99,576                    | 4                   | Pfizer               | 101                       | Yes                            | 117,627                   | 2                   |
| 7  | Celgene              | 22                        | Yes                            | 24,383                    | 24                  | Bristol-Myers-Squibb | 5                         | Yes                            | 71,725                    | 9                   | Bayer                | 100                       | Yes                            | 47,632                    | 15                  |
| 8  | Bayer                | 20                        | Yes                            | 47,632                    | 15                  | Bayer                | 4                         | Yes                            | 47,632                    | 15                  | Roche                | 91                        | Yes                            | 117,882                   | 1                   |
| 9  | Bristol-Myers-Squibb | 20                        | Yes                            | 71,725                    | 9                   | Roche                | 4                         | Yes                            | 117,882                   | 1                   | Janssen              | 87                        | Yes                            | 99,220                    | 5                   |
| 10 | Boehringer-Ingelheim | 19                        | Yes                            | 39,187                    | 18                  | Servier              | 3                         | Yes                            | 12,543                    | 30                  | Msd                  | 84                        | Yes                            | 99,576                    | 4                   |

|        |                                  |    |     |            |    |                     |   |     |            |    |                          |    |     |            |    |
|--------|----------------------------------|----|-----|------------|----|---------------------|---|-----|------------|----|--------------------------|----|-----|------------|----|
| 1<br>1 | Medtronic                        | 18 | No  | -          | -  | Gilead              | 3 | Yes | 60,52<br>5 | 10 | Celgene                  | 50 | Yes | 24,38<br>3 | 24 |
| 1<br>2 | Abbvie                           | 16 | Yes | 80,69<br>0 | 7  | A-Menarini          | 2 | Yes | 8,421      | 41 | Novo-<br>Nordisk         | 47 | Yes | 46,42<br>3 | 16 |
| 1<br>3 | Glaxosmithk<br>line              | 15 | Yes | 79,35<br>6 | 8  | Sanofi              | 2 | Yes | 91,19<br>7 | 6  | Boehringer-<br>Ingelheim | 40 | Yes | 39,18<br>7 | 18 |
| 1<br>4 | Lilly                            | 13 | Yes | 50,97<br>8 | 14 | Astrazeneca         | 2 | Yes | 55,80<br>1 | 12 | Sanofi                   | 37 | Yes | 91,19<br>7 | 6  |
| 1<br>5 | Amgen                            | 13 | Yes | 58,26<br>8 | 11 | Amgen               | 2 | Yes | 58,26<br>8 | 11 | Biogen                   | 36 | Yes | 28,58<br>0 | 22 |
| 1<br>6 | Gilead                           | 12 | Yes | 60,52<br>5 | 10 | Novo-<br>Nordisk    | 2 | Yes | 46,42<br>3 | 16 | Takeda                   | 34 | Yes | 52,94<br>3 | 13 |
| 1<br>7 | Servier                          | 12 | Yes | 12,54<br>3 | 30 | Glaxosmithk<br>line | 2 | Yes | 79,35<br>6 | 8  | Abbvie                   | 34 | Yes | 80,69<br>0 | 7  |
| 1<br>8 | Sanofi                           | 9  | Yes | 91,19<br>7 | 6  | Shire               | 2 | Yes | 25,52<br>4 | 23 | Ucb                      | 33 | Yes | 13,02<br>3 | 29 |
| 1<br>9 | St.-Jude-<br>Medical-<br>Belgium | 9  | No  | -          | -  | Ucb                 | 1 | Yes | 13,02<br>3 | 29 | Lilly                    | 32 | Yes | 50,97<br>8 | 14 |
| 2<br>0 | Merck                            | 8  | Yes | 18,75<br>8 | 27 | Astellas            | 1 | Yes | 29,23<br>6 | 21 | Gilead                   | 29 | Yes | 60,52<br>5 | 10 |

**Table S4:** Top 20 drug company funders in Belgium, Ireland and the UK based on R&D payments as a share of all payments (2017-19)

|   | BELGIUM                             |                       |                                |                           |                     | IRELAND                  |                       |                                |                           |                     | UK                   |                       |                                |                           |                     |
|---|-------------------------------------|-----------------------|--------------------------------|---------------------------|---------------------|--------------------------|-----------------------|--------------------------------|---------------------------|---------------------|----------------------|-----------------------|--------------------------------|---------------------------|---------------------|
|   | Company name                        | Share of R&D payments | At least once in global top 50 | Global sales – value (€m) | Global sales – rank | Company name             | Share of R&D payments | At least once in global top 50 | Global sales – value (€m) | Global sales – rank | Company name         | Share of R&D payments | At least once in global top 50 | Global sales – value (€m) | Global sales – rank |
| 1 | Thrombogenics                       | 0.98                  | No                             | -                         | -                   | Allergan                 | 1.00                  | Yes                            | 39,219                    | 17                  | Clinuvel             | 1.00                  | No                             | -                         | -                   |
| 2 | Regeneron-Ireland-Unlimited-Company | 0.98                  | Yes                            | 11,097                    | 35                  | Servier                  | 0.76                  | Yes                            | 12,543                    | 30                  | Biotest              | 0.98                  | No                             | -                         | -                   |
| 3 | Sarepta                             | 0.97                  | No                             | -                         | -                   | Swedish-Orphan-Biovitrum | 0.73                  | No                             | -                         | -                   | Bluebird             | 0.97                  | No                             | -                         | -                   |
| 4 | Amplitude                           | 0.94                  | No                             | -                         | -                   | Gilead                   | 0.70                  | Yes                            | 60,525                    | 10                  | Allergan             | 0.95                  | Yes                            | 39,219                    | 17                  |
| 5 | Hra                                 | 0.92                  | No                             | -                         | -                   | Celgene                  | 0.69                  | Yes                            | 24,383                    | 24                  | Otsuka               | 0.94                  | Yes                            | 15,571                    | 28                  |
| 6 | Jazz                                | 0.88                  | No                             | -                         | -                   | Shire                    | 0.68                  | Yes                            | 25,524                    | 23                  | Diurnal              | 0.94                  | No                             | -                         | -                   |
| 7 | Zoetis-Belgium                      | 0.87                  | No                             | -                         | -                   | Bristol-Myers-Squibb     | 0.66                  | Yes                            | 71,725                    | 9                   | Astrazeneca          | 0.91                  | Yes                            | 55,801                    | 12                  |
| 8 | Celgene                             | 0.85                  | Yes                            | 24,383                    | 24                  | Msd                      | 0.64                  | Yes                            | 99,576                    | 4                   | Bristol-Myers-Squibb | 0.91                  | Yes                            | 71,725                    | 9                   |
| 9 | Cochlear-Benelux                    | 0.84                  | No                             | -                         | -                   | Janssen                  | 0.63                  | Yes                            | 99,220                    | 5                   | Shionogi             | 0.91                  | No                             | -                         | -                   |



|    |                      |      |     |         |    |                      |      |     |         |    |                    |      |     |         |    |
|----|----------------------|------|-----|---------|----|----------------------|------|-----|---------|----|--------------------|------|-----|---------|----|
| 10 | Bellco               | 0.84 | No  | -       | -  | Boehringer-Ingelheim | 0.51 | Yes | 39,187  | 18 | Celgene            | 0.91 | Yes | 24,383  | 24 |
| 11 | Astrazeneca          | 0.83 | Yes | 55,801  | 12 | Bayer                | 0.47 | Yes | 47,632  | 15 | Eisai              | 0.89 | Yes | 11,909  | 31 |
| 12 | Nevro-Medical        | 0.82 | No  | -       | -  | Abbvie               | 0.47 | Yes | 80,690  | 7  | Servier            | 0.88 | Yes | 12,543  | 30 |
| 13 | Bristol-Myers-Squibb | 0.82 | Yes | 71,725  | 9  | Biogen               | 0.45 | Yes | 28,580  | 22 | Biomarin           | 0.88 | No  | -       | -  |
| 14 | Otsuka               | 0.82 | Yes | 15,571  | 28 | Glaxosmithkline      | 0.44 | Yes | 79,356  | 8  | Gw-Pharmaceuticals | 0.87 | No  | -       | -  |
| 15 | Servier              | 0.80 | Yes | 12,543  | 30 | Roche                | 0.43 | Yes | 117,882 | 1  | Indivior           | 0.86 | No  | -       | -  |
| 16 | Roche                | 0.80 | Yes | 117,882 | 1  | Amgen                | 0.42 | Yes | 58,268  | 11 | Tesaro             | 0.86 | No  | -       | -  |
| 17 | Duo---Med            | 0.79 | No  | -       | -  | Astrazeneca          | 0.41 | Yes | 55,801  | 12 | Msd                | 0.83 | Yes | 99,576  | 4  |
| 18 | Msd                  | 0.76 | Yes | 99,576  | 4  | Pfizer               | 0.41 | Yes | 117,627 | 2  | Clovis-Oncology    | 0.83 | No  | -       | -  |
| 19 | Novartis             | 0.73 | Yes | 115,170 | 3  | Almirall             | 0.38 | No  | -       | -  | Roche              | 0.83 | Yes | 117,882 | 1  |
| 20 | Volcano-Europe       | 0.70 | No  | -       | -  | Novo-Nordisk         | 0.34 | Yes | 46,423  | 16 | Mitsubishi         | 0.81 | Yes | 7,327   | 43 |

**Table S5:** Shared companies in the top 20 drug company funders in Belgium, Ireland and the UK based (2017-19)

|                       | <b>BELGIUM – IRELAND</b> | <b>BELGIUM – UK</b> | <b>IRELAND – UK</b> |
|-----------------------|--------------------------|---------------------|---------------------|
| R&D payments          | 0.75                     | 0.75                | 0.90                |
| All payments          | 0.70                     | 0.75                | 0.75                |
| Share of R&D payments | 0.30                     | 0.35                | 0.35                |
